# Supplementary material for: Saccharomyces cerevisiae: First Steps to a Suitable Model System To Study the Function and Intracellular Transport of Human Kidney Anion Exchanger 1
Source: PubMed Central journal article supplement (PMC6992373; doi:10.1128/msphere.00802-19), 2020-01-29
Supplement: mSphere.00802-19-sd001.pdf [file mSphere.00802-19-sd001.pdf]

**Data set S1:**

(A) hkAE1<sup>V5</sup>

ctcgaggaattcATGGACGAAAAGAACCAGGAGCTGAGATGGATGGAGGCGGCGCGCTGGGTGCAACTGGAGGAGAACC  
TGGGGGAGAATGGGGCCTGGGGCCGCCCGCACCTCTCTCACCTCACCTTCTGGAGCCTCCTAGAGCTGCGTAGAGT  
CTTCACCAAGGGTACTGTCTCCTAGACCTGCAAGAGACCTCCCTGGCTGGAGTGGCCAACCAACTGCTAGACAGG  
TTTATCTTTGAAGACCAGATCCGGCCTCAGGACCGAGAGGAGCTGCTCCGGGCCCTGCTGCTTAAACACAGCCACG  
CTGGAGAGCTGGAGGCCCTGGGGGGTGTGAAGCCTGCAGTCCTGACACGCTCTGGTGATCCTTACAGCCTCTGCT  
CCCCAACACTCCTCACTGGAGACACAGCTCTTCTGTGAGCAGGGAGATGGGGGCACAGAAGGGCACTCACCATC  
TGGTATTCTGGAAGATTCACCGGATTCAGAGGCCACGTTGGTGCTAGTGGGCCGCGCCGACTTCTGGAGCAG  
CCGGTGCTGGGCTTCGTGAGGCTGCAGGAGGCAGCGGAGCTGGAGGCGGTGGAGCTGCCGGTGCCTATACGCTTC  
CTCTTTGTGTTGCTGGGACCTGAGGCCCCCCACATCGATTACCCAGCTTGGCCGGGCTGCCACCCCTCATGTC  
AGAGAGGGTGTTCGCATAGATGCTTACATGGCTCAGAGCCGAGGGAGCTGCTGCACTCCCTAGAGGGCTTCT  
GGACTGCAGCCTAGTGCTGCCTCCACCGATGCCCCCTCCGAGCAGGCACTGCTCAGTCTGGTGCTGTGCAGAGG  
GAGTACTTCGAAGGCGCTATCAGTCCAGCCCTGCCAAGCCAGACTCCAGCTTCTACAAGGGCCTAGACTTAAATG  
GGGGCCAGATGACCCTCTGCAGCAGACAGGCCAGCTCTTCGGGGCCCTGGTGCGTGATATCCGGCGCCGCTACC  
CCTATTACCTGAGTGACATCACAGATGCATTCAGCCCCAGGCTCTGGCTGCCGTCATCTTCATCTACTTTGCTGCA  
CTGTCAACCCGCCATCACCTTCGGCGGCCCTCCTGGGAGAAAAGACCCGGAACAGATGGGAGTGTCCGGAGCTGCTG  
ATCTCCACTGCAGTGGAGGCATTCTCTTCGCCCTGCTGGGGCTCAGCCCTGCTTGTGGTCCGGCTTCTCAGGACC  
CCTGTGGTGTGTTGAGGAAGCCTTCTTCTCGTTCTGCGAGACCAACCGTCTAGAGTACATCGTGGGCCGCGTGTGC  
ATCGGCTTCTGGCTCATCTGCTGGTGGTGTGGTGGTGGCTTCGAGGGTAGCTTCTGGTCCGCTTCATCTCCCG  
CTATAACCCAGGAGATCTTCTCCTTCTCATTTCCTCATCTTCATCTATGAGACTTTCTCCAAGCTGATCAAGATCTT  
CCAGGACCACCCACTACAGAAGACTTATAACTACAACGTGTTGATGGTGCCAAACCTCAGGGCCCCCTGCCAA  
CACAGCCCTCCTCTCCCTGTGCTCATGGCCGGTACCTTCTTCTTGGCATGATGCTGCGCAAGTTCAAGAACAGCT  
CCTATTTCCCTGGCAAGCTGCGTCCGGTTCATCGGGGACTTCGGGGTCCCCATCTCCATCCTGATCATGGTCTGGT  
GATTTCTTCATTCAGGATACCTACACCCAGAAACTCTCGGTGCCTGATGGCTCAAGGTGTCCAACCTCCTCAGCCC  
GGGGCTGGGTATCCACCCACTGGGCTTGGCTTCCGAGTTCCCATCTGGATGATGTTGCTCCGCCCCTGCTGCT  
CTGCTGGTCTTCATCCTCATATTCCTGGAGTCTCAGATCACACAGCTGATTGTAGCAAAACCTGAGCGCAAGATGG  
TCAAGGGCTCCGGCTTCCACCTGGACCTGCTGCTGGTAGTAGGCATGGGTGGGGTGGCCGCCCTCTTTGGGATGCC  
CTGGCTCAGTGCCACCACCGTGCCTTCCGTCACCCATGCCAACGCCCTCACTGTCATGGGCAAAGCCAGCACCCCA  
GGGGCTGCAGCCAGATCCAGGAGGTCAAAGAGCAGCGGATCAGTGGACTCCTGGTCCGCTGTGCTTGTGGGCCTG  
TCCATCCTCATGGAGCCCATCTGTCCCGCATCCCCCTGGCTGTACTGTTGGCATCTTCTCTACATGGGGGTAC  
GTCGCTCAGCGGCATCCAGCTCTTTGACCGCATCTTGTCTTCTGTTCAAGCCACCCAAGTATCACCCAGATGTGCCCT  
ACGTCAAGCGGGTGAAGACCTGGCGCATGCATTTACCGGCATCCAGATCATCTGCCTGGCAGTGTCTCCTGCTG  
GGTGAAGTCCACCGCCCTCCCTGGCCCTGCCCTTGTCCCTCATCCTCAGTGTGCCGCTGCCGCGCTCCTGCTGC  
CGCTCATCTTCAGGAACGTGGAGCTTCAGTGTCTGGATGCTGATGATGCCAAGGCAACCTTTGATGAGGAGGAAG  
GTCGGGATGAATACGACGAAGTGGCCATGCCTGTGGGTAAGCCTATCCCTAACCCCTCTCCTCGGTCTCGATTCT  
**ACGTG**Aggatccgtgac

(B) Kar2<sup>SS</sup>-hkAE1<sup>V5</sup>

ctcgaggaattcATGTTTTTCAACAGACTAAGCGCTGGCAAGCTGCTGGTACCCTCTCCGTGGTCTGTACGCCCTTTTC  
GTGGTAATATTACCTTTACAGAATTTTCCACTCCTCCAATGTTTTAGTTAGAGGTGCCGATGACGAAAAGAACC  
AGGAGCTGAGATGGATGGAGGCGGCGCTGGGTGCAACTGGAGGAGAACCCTGGGGGAGAATGGGGCCTGGGGC  
CGCCCGCACCTCTCTCACCTCACCTTCTGGAGCCTCCTAGAGCTGCGTAGAGTCTTACCAAGGGTACTGTCTCCT  
AGACCTGCAAGAGACCTCCCTGGCTGGAGTGGCCAACCAACTGCTAGACAGGTTTATCTTTGAAGACCAGATCCG  
GCCTCAGGACCGAGAGGAGCTGCTCCGGGCCCTGCTGCTTAAACACAGCCACGCTGGAGAGCTGGAGGCCCTGGG  
GGGTGTGAAGCCTGCAGTCTGACACGCTCTGGTGATCCTTACAGCCTCTGCTCCCCAACACTCCTCACTGGAG  
ACACAGCTCTTCTGTGAGCAGGGAGATGGGGGCACAGAAGGGCACTCACCATCTGGTATTCTGGAAGAGATTCCC  
CCGGATTACAGAGGCCACGTTGGTGCTAGTGGGCCGCGCCGACTTCCCTGGAGCAGCCGGTGTGGGCTTCGTGAGG  
CTGCAGGAGGCAGCGGAGCTGGAGGCGGTGGAGCTGCCGGTGCCTATACGCTTCTCTTTGTGTTGCTGGGACCTG  
AGGCCCCCACATCGATTACCCAGCTTGGCCGGGCTGCTGCCACCCTCATGTCAGAGAGGGTGTTCGCATAGA  
TGCCTACATGGCTCAGAGCCGAGGGGAGCTGCTGCACTCCCTAGAGGGCTTCTGGACTGCAGCCTAGTGCTGCCT  
CCCACCGATGCCCTCCGACAGGCACTGCTCAGTCTGGTGCCTGTGTCAGAGGGAGCTACTTCGAAGGCGCTATC  
AGTCCAGCCCTGCCAAGCCAGACTCCAGCTTCTACAAGGGCCTAGACTTAAATGGGGGCCACAGATGACCCTGTC  
AGCAGACAGGCCAGCTTCTCGGGGCCCTGGTGCCTGATATCCCGCCGCTACCCCTATTACCTGAGTGACATCAC  
AGATGCATTCAGCCCCAGGCTCCTGGCTGCCGTCATCTTCATCTACTTTGCTGCACTGTCACCCGCCATCACCTTCG  
GCGGCCCTCCTGGGAGAAAAGACCCGGAACAGATGGGAGTGTCCGGAGCTGCTGATCTCCACTGCAGTGCAGGGCA  
TTCTCTCGCCCTGCTGGGGCTCAGCCCTGCTTGTGGTCCGCTTCTCAGGACCCCTGCTGGTGTGTTGAGGAAGCC

TTCTTCTCGTTCTGCGAGACCAACGGTCTAGAGTACATCGTGGGCCGCGTGTGGATCGGCTTCTGGCTCATCCTGCT  
GGTGGTGTGGTGGTGGCCTTCGAGGGTAGCTTCCCTGGTCCGCTTCATCTCCCGCTATACCCAGGAGATCTTCTCCT  
TCCTCATTTCCCTCATCTTCATCTATGAGACTTTCTCCAAGCTGATCAAGATCTTCCAGGACCACCCACTACAGAAG  
ACTTATAACTACAACGTGTTGATGGTGCCAAACCTCAGGGCCCCCTGCCAACACAGCCCTCCTCTCCCTTGTGCT  
CATGGCCGGTACCTTCTTTGCCATGATGCTGCGCAAGTTCAGAACAGCTCCTATTTCCCTGGCAAGCTGCGTC  
GGGTCATCGGGGACTTCGGGGTCCCCATCTCCATCCTGATCATGGGCCTGGTGGATTTCTTCATTCAGGATACCTAC  
ACCCAGAACTCTCGGTGCTGATGGCTTCAAGGTGTCCAACCTCAGCCCGGGGCTGGGTCATCCACCCACTGG  
GCTTGCCTCCGAGTTCCCATCTGGATGATGTTGCTCCGCTGCCTGCTCTGCTGGTCTTCATCCTCATATTCC  
TGGAGTCTCAGATCACCACGCTGATTGTCAGCAAACCTGAGCGCAAGATGGTCAAGGGCTCCGGCTTCCACCTGG  
ACCTGCTGCTGGTAGTAGGCATGGGTGGGGTGGCCGCCCTCTTTGGGATGCCCTGGCTCAGTGCCACCACCGTGGC  
TTCCGTCACCCATGCCAACGCCCTCACTGTCATGGGCAAAGCCAGCACCCAGGGGCTGCAGCCAGATCCAGGA  
GGTCAAAGAGCAGCGGATCAGTGGACTCCTGGTGCCTGTGCTTGTGGCCTGTCCATCCTCATGGAGCCCATCTGT  
TCCCGCATCCCCCTGGCTGATGTTGGCATCTTCCCTTACATGGGGGTCACGTCGCTCAGCCGATCCAGCTCTT  
TGACCGCATCTTGTCTGTTCAAGCCACCCAAGTATCACCCAGATGTGCCCTACGTCAAGCGGGTGAAGACCTGG  
CGCATGCATTTATTACGGGCATCCAGATCATCTGCCTGGCAGTGTGCTGGGTGGTGAAGTCCACGCCGCCCTCC  
TGGCCCTGCCCTTCTGCTCCTCATCTCACTGTGCCGCTGCGGCGCGTCTGCTGCCGCTCATCTTCAGGAACGTGGAG  
CTTCAGTGTCTGGATGCTGATGATGCCAAGGCAACCTTGTATGAGGAGGAAGGTTCGGGATGAATACGACGAAGTG  
GCCATGCCTGTGGGTAAGCCTATCCCTAACCCCTCTCCTCGGTCTCGATTCTACGTGAggatccgctgac

(C) ykAE1<sup>V5</sup>

ctcgaggaattcATGGACGAAAAGAATCAAGAATTGAGATGGATGGAAGCTGCTAGATGGGTTCAATTGGAAGAAAATT  
TGGGTGAAAATGGTGCCTGGGGTAGACCACATTTGTCTCATTGACTTTTTGGTCCCTGTTGGAATTGAGAAGAGTT  
TTCATAAGGGTACTGTCTTGTGGACTTGAAGAACTTCTTTGGCTGGTGTGGCAATCAATTATTGGACAGATT  
CATTTTCGAAGATCAAATCAGACCACAAGATAGAGAAGAATTATTGAGAGCCTGTTGTTGAAGCACTCTCATGCT  
GGTGAATTGGAAGCTTGTGGTGTAAAGCCAGCTGTTTGGACTAGATCTGGTGTATCCATCACAAACCATTTGC  
CACAAATTTCTTATTGGAAAACCAATTATTCTGCGAACAAAGGTGATGGTGGTACTGAAGGTCATTCTCCATCTGG  
TATTTTGGAAAAGATTCCACCAGATTCTGAAGCCACTTTGGTTTTGGTTGGTAGAGCTGATTTTTTGGAAACAACCAG  
TTTTGGGTTTTCGTTAGATTGCAAGAAGCTGCTGAATTAGAAGCAGTTGAATTGCCAGTTCCAATCAGATTCTTGTTC  
GTTTTGTGGGTCCAGAAGCTCCACATATTGATTATACTCAATTGGGTAGAGCCGCTGCTACTTTGATGTCTGAAAG  
AGTTTTTAGAATCGACGCTTACATGGCTCAATCCAGAGGTGAATTATTGCATTCTTTGGAAGGTTTCTTGGACTGCT  
CTTTAGTTTTGCCACCAACTGATGCTCCATCTGAACAAGCTTTGTTGTCTTTGGTCCAGTTCAAAGAGAATTATTG  
AGAAGAAGATACCAAACTCTCCAGCTAAACCAGACTCTTCATTTTACAAGGGTTGGATTTGAATGGTGGTCCAG  
ATGAATCCATTGCAACAACTTGGTCAATTATTCGGTGGTTGGTTAGAGACATCAGAAGAAGATATCCTTACTACTT  
GTCCGATATCACCGATGCTTTTTACCACAAGTTTTGGCTGCTGTTATCTTATCTATTTCGCTGCTTTGTCACCAGC  
TATTACTTTTTGGTGGTTTTATTAGGTGAAAAGACCAGAAATCAAATGGGTGTTTTCCGAATTATTGATCTCCACTGCTG  
TTCAAGGTATTTTGTGGCTTTGTTAGGTGCCAACCTTTGTTGGTGTGGTTTTCTGGTCCATTATTGGTCTTTGA  
AGAAGCTTTCTTCTCCTTCTGTGAAACTAACGGTTTTGGAATATATCGTCGGTAGAGTTGGATTGGTTCTGGTTAA  
TTTTGTGGTTCGTTTTGGTTCGCTTTCGAAGGTTCAATTTTGGTAAGATTCACTCCAGATACACCCAAGAAATC  
TTTTTTCTTGTATCTCCTTGATTTTCACTACGAAACCTTCTCCAAGTTGATCAAGATCTTCCAAGATCACCCATTG  
CAAAAGACCTACAACCTACAACGTTTTGATGGTTCCAAAACCACAAGGTCCATTGCCAAATACTGCTTTATTATCTT  
TGGTTTTAATGGCCGGTACTTTCTTCTTTGCCATGATGTTGAGAAAGTTCAAGAACTCCTCTTACTTCCCAGGTAAG  
TTGAGAAGAGTCATTGGTGTATTTGGTGTCCCAATCTCCATTTTGAATTATGGTCTTGGTTGACTTCTTCATCCAAGA  
TACTTACACCCAAAAGTTGTCTGTTCCAGATGGTTTTCAAGGTCAGTAATTCTCAGCTAGAGGTTGGGTTATTCATC  
CATTGGGTTTTGAGATCCGAATTTCCAATTTGGATGATGTTGCTTCTGCTTTGCCAGCTTTATTGGTTTTATCTTGA  
TATTCTTGGAAATCCCAATCACCACCTTGATCGTTTTCTAAACCTGAAAAGAAAGATGGTCAAGGGTTCTGGTTTTAC  
TTGGATTTGTTGTTAGTTGTCGGTATGGGTGGTGTGCAGCTTTGTTGGTATGCCATGGTGTCTGCTACTACTGTT  
AGATCTGTTACTCATGCTAACGCTTTGACTGTTATGGGTAAGCTTCTACTCCAGGTGCTGCTGCTCAAATTCAGA  
AGTAAAAGAACAAAGAATTTCCGGTTTTGTTGGTAGCCGTTTTAGTTGGTTTTGTCAATCTTGATGGAACCTATCTTGT  
CTAGAATCCCATTGGCTGTTTTGTTCCGATTTTTCTGTACATGGGTGTCACATCCTTGTCCGGTATCCAATTTTGT  
ATAGAATCTTGTGTTATTCAAGCCACCAAAGTACCATCCAGATGTTCCCTTATGTTAAGAGAGTCAAGACTTGGAG  
AATGCATTTGTTACCCGATTCAAATTTATCTGCTTGGCAGTTTTGTGGGTTGTTAAGTCAACTCCAGCTTCTTTAG  
CATTGCCATTCGTTTTGATTTGACCGTCCCATTAAGAAGAGTCTTGTGGCATTGATATTAGAAAACGTCGAATTTG  
CAATGTTTGGATGCTGATGATGCTAAGGCTACTTTTTGACGAAGAAGAAGGTAGAGACGAATACGATGAAGTTGCT  
ATGCCAGTTGGTAAGCCAATTCCAAATCCATTATTAGGTTTGGACTCCACTTAAggatccgctgac

(D) kAE1<sup>HA</sup>

ctcgagATGGACGAAAAGAATCAAGAATTGAGATGGATGGAAGCTGCTAGATGGGTTCAATTGGAAGAAAATTTGGG  
TGAAAATGGTGCCTGGGGTAGACCACATTTGTCTCATTGACTTTTTGGTCCCTGTTGGAATTGAGAAGAGTTTTTCA

CTAAGGGTACTGTCTTGTGGACTTGCAAGAACTTCTTTGGCTGGTGTGCAATCAATTATTGGACAGATTCATT  
TTCGAAGATCAAATCAGACCACAAGATAGAGAAGAATTATTGAGAGCCTTGTGTTGAAGCACTCTCATGCTGGTG  
AATTGGAAGCTTTAGGTGGTGTAAAGCCAGCTGTTTGGACTAGATCTGGTGTATCCATCACAACCATTATTGCCACA  
ACATTTCTTATTGGAAACCAATTATTCTGCGAACAAGGTGATGGTGGTACTGAAGGTCATTCTCCATCTGGTATTT  
TGGAAAAGATCCACCAGATTCTGAAGCCACTTTGGTTTGGTGGTAGAGCTGATTTTTTGGAAACAACCAGTTTTG  
GGTTTCGTTAGATTGCAAGAAGCTGCTGAATTAAGAAGCAAGTGAATTGCCAGTTCCAATCAGATTCTTGTTCGTTTT  
GTTGGGTCCAGAAGCTCCACATATTGATTATACTCAATTGGGTAGAGCCGCTGCTACTTTGATGTCTGAAAGAGTT  
TTTAGAATCGACGTTACATGGCTCAATCCAGAGGTGAATTATTGCATTCTTTGGAAGGTTTCTTGGACTGCTCTTT  
AGTTTTGCCACCAACTGATGCTCCATCTGAACAAGCTTTGTTGTCTTTGGTTCAGTTCAAAGAGAATTATTGAGAA  
GAAGATACCAATCCTCTCCAGCTAAACCAGACTCTTCATTTTACAAGGGTTGGATTTGAATGGTGGTCCAGATGA  
TCCATTGCAACAAACTGGTCAATTATTCGGTGGTTTTGGTTAGAGACATCAGAAGAAGATATCCTTACTACTTGTCC  
GATATCACCGATGCTTTTTACCACAAGTTTTGGCTGCTGTTATCTTCATCTATTTTCGCTGCTTTGTCACCAGCTATT  
ACTTTTGGTGGTTTTATTAGGTGAAAAGACCAGAAATCAAATGGGTGTTTTCCGAATTATTGATCTCCACTGCTTCA  
AGGTATTTGTTGCTTTGTTAGGTGCCAACCTTTGTTGGTGTGGTTTTTCTGGTCCATTATTGGTCTTTGAAGA  
AGCTTTCTCTCCTTCTGTGAAACTAACGGTTTGGAAATATATCGTCGGTAGAGTTTGGATTGGTTTTCTGGTTAATTTT  
GTTGGTCGTTTTGGTGCCTGCTTTCGAAGGTTCATTTTGGTAAGATTTCATCTCCAGATACACCCAAGAAATCTTTT  
CTTTCTGATCTCCTTGATTTTCATCTACGAAACCTTCTCCAAGTTGATCAAGATCTTCCAAGATCACCCATTGCAA  
AAGACCTACAACACTACAAC**TACCCATACGATGTTCCAGATTACGCT**GTTTTGATGGTTCCAAAACCACAAGGTCC  
ATTGCCAAATACTGCTTTATTATCCTTGGTTTTAATGGCCGCTACTTTCTTCTTGGCATGATGTTGAGAAAGTTCAA  
GAACCTCTTACTTCCAGGTAAGTTGAGAAGTCAAGTTCATGGTATTTTGGTGTCCCAATCTCCATTGTTGATTATG  
TCTTGGTTGACTTCTTCATCCAAGATACTTACACCCAAAAGTTGCTGTTCCAGATGGTTTCAAGGTCAGTAATTCT  
TCAGCTAGAGGTTGGGTTATTCATCCATTGGGTTTGGATCCGAATTTCCAATTTGGATGATGTTTCGCTTCTGCTTT  
GCCAGCTTTATTGGTTTTTATCTTGATATTCTTGAATCCCAAATCACACCTTGATCGTTTCTAAACCTGAAAGAA  
AGATGGTCAAGGGTCTGGTTTTCACTTGGATTGTTGTTAGTTGTCGGTATGGGTGGTGTGTCAGCTTTGTTGGT  
ATGCCATGGTTGCTGCTACTACTGTTAGATCTGTTACTCATGCTAACGCTTTGACTGTTATGGGTAAGGCTTCTAC  
TCCAGTGCTGCTCAAATCAAGAAGTAAAAGAACAAGAATTTCCGGTTTGGTAGCCGTTTTAGTTGGT  
TTGTCATCTTGATGGAACCTATCTTGTCTAGAATCCCATTTGGCTGTTTTGTTTCGGTATTTTCTTGTACATGGGTGTC  
ACATCCTTGTCCGGTATCCAATTATTTGATAGAATCTTGTGTTATTCAAGCCACCAAAAGTACCATCCAGATGTTCC  
TTATGTTAAGAGAGTCAAGACTTGGAGAATGCATTTGTTCCACCGGATTCAAATTATCTGCTTGGCAGTTTTGTGGG  
TTGTTAAGTCAACTCCAGCTTCTTTAGCATTGCCATTGTTTTGATTTTGACCGTCCCATTAAGAAGAGTCTTGTGTC  
CATTGATATTCAGAAACGTCGAATGCAATGTTGGATGCTGATGATGCTAAGGCTACTTTTGACGAAGAAGAAGG  
TAGAGACGAATACGATGAAGTTGCTATGCCAGTTTTA**Aggatcc**

(E) kAE1<sup>B3mem</sup> (aa 361 to 911)

gtcgacggattctcagagATGT**TACCCATACGATGTTCCAGATTACGCT**ggtggtggtgtagtGGTTTGGATTTGAATGGTGGTCCA  
GATGATCCATTGCAACAACTGGTCAATTATTCGGTGGTTTGGTTAGAGACATCAGAAGAAGATATCCTTACTACT  
TGTCCGATATCACCGATGCTTTTTACCACAAGTTTTGGCTGCTGTTATCTTCATCTATTTTCGCTGCTTTGTCACCAG  
CTATTACTTTTGGTGGTTTATTAGGTGAAAAGACCAGAAAATCAAATGGGTGTTTCCGAATTATTGATCTCCACTGCT  
GTTCAAGGTATTTTCTTGTGTTAGGTGCCCCAACCTTTGTTGGTGTGGTTTTTCTGGTCCATTATTGGTCTTTG  
AAGAAGCTTCTTCTCCTTCTGTGAAACTAACGGTTTGGAAATATATCGTCGGTAGAGTTTGGATTGGTTTCTGGTTA  
ATTTTGTGGTTCGTTTTGGTTCGCTTTCGAAGGTTCATTTTGGTAAGATTTCATCTCCAGATACACCCAAGAAAT  
CTTTTCTTCTTGATCTCCTTGATTTTCATCTACGAAACCTTCTCCAAGTTGATCAAGATCTTCCAAGATCACCCATT  
GCAAAAGACCTACAACACTACAACGTTTTGATGGTTCCAAAACCACAAGTCCATTGCCAAATACTGCTTTATATCC  
TTGGTTTTAATGGCCGGTACTTTCTTCTTGGCATGATGTTGAGAAAGTTCAAGAACTCCTTACTTCCCAGGTA  
GTTGAGAAGAGTCAATGGTGATTTTGGTGTCCCAATCTCCATTTTGAATATGGTCTTGGTTGACTTCTTCATCCAAG  
ATACTTACACCCAAAAGTTGTCTGTTCAGATGGTTTCAAGGTCAGTAATTTTCAGCTAGAGGTTGGGTTATTCAT  
CCATTGGGTTTGGATCCGAATTTCCAATTTGGATGATGTTTCGCTTCTGCTTTGCCAGCTTTATTGGTTTTTATCTTG  
ATATTCTTGAATCCCAAATCACACCTTGATCGTTTCTAAACCTGAAAGAAAGATGGTCAAGGGTTCTGGTTTTCT  
ACTTGGATTTGTTGTTAGTTGTCGGTATGGGTGGTGTGTCAGCTTTGTTTGGTATGCCATGGTGTCTGCTACTACTG  
TTAGATCTGTTACTCATGCTAACGCTTTGACTGTTATGGGTAAAGCTTCTACTCCAGGTGCTGCTGCTCAAATCAA  
GAAGTAAAAGAACAAGAATTTCCGGTTTTGTTGGTAGCCGTTTTAGTTGGTTTGTCAATCTTGATGGAACCTATCTT  
GTCTAGAATCCCATTTGGCTGTTTTGTTTCGGTATTTTCTGTACATGGGTGTCACATCTTGTCCGGTATCCAATTAT  
TGATAGAATCTTGTGTTATTCAAGCCACCAAGTACCATCCAGATGTTCCCTTATGTTAAGAGAGTCAAGACTTGG  
AGAATGCATTTGTTACCAGGTTATCAAATTACTGTCTGGCAGTTTTGTGGGTTGTTAAGTCAACTCCAGCTTTCTT  
AGCATTGCCATTCGTTTTGATTTTGCACCGTCCCATTAAGAAGAGTCTTGTGTCATTGATATTCAAGAAACGTCGAAT  
TGCAATGTTTGGATGCTGATGATGCTAAGGCTACTTTTGCAGGAAGAAGAAGGTAGAGACGAATACGATGAAGTTG  
CTATGCCAGTTTTA**Aggatccgagtc**
