# Supplementary material for: Saccharomyces cerevisiae: First Steps to a Suitable Model System To Study the Function and Intracellular Transport of Human Kidney Anion Exchanger 1
Source: PubMed Central journal article supplement (PMC6992373; doi:10.1128/msphere.00802-19), 2020-01-29
Supplement: mSphere.00802-19-st001.pdf [file mSphere.00802-19-st001.pdf]

**Table S1.**

| <i>S. cerevisiae</i> strain                        | Genotype                                                                                                                                                                                       | Reference       |
|----------------------------------------------------|------------------------------------------------------------------------------------------------------------------------------------------------------------------------------------------------|-----------------|
| BY4742                                             | MAT $\alpha$ <i>his3<math>\Delta</math>1 leu2<math>\Delta</math>0 lys2<math>\Delta</math>0 ura3<math>\Delta</math>0</i>                                                                        | Open Biosystems |
| $\Delta$ <i>end3</i>                               | MAT $\alpha$ <i>end3 his3<math>\Delta</math>1 leu2<math>\Delta</math>0 lys2<math>\Delta</math>0 ura3<math>\Delta</math>0</i>                                                                   | Open Biosystems |
| $\Delta$ <i>pep4</i>                               | MAT $\alpha$ <i>pep4 his3<math>\Delta</math>1 leu2<math>\Delta</math>0 lys2<math>\Delta</math>0 ura3<math>\Delta</math>0</i>                                                                   | Open Biosystems |
| BY4742 <i>Pma1-mRFP</i> + <i>kAE1<sup>HA</sup></i> | MAT $\alpha$ <i>his3<math>\Delta</math>1 leu2<math>\Delta</math>0::PMA1-mRFP-LEU2 lys2<math>\Delta</math>0 ura3<math>\Delta</math>0 [pYES2.1 kAE1<sup>HA</sup>]</i>                            | This study      |
| BY4742 <i>Pma1-mRFP</i> + <i>yeGFP-kAE1</i>        | MAT $\alpha$ <i>his3<math>\Delta</math>1 leu2<math>\Delta</math>0::PMA1-mRFP-LEU2 lys2<math>\Delta</math>0 ura3<math>\Delta</math>0 [pYES2.1 yeGFP-kAE1]</i>                                   | This study      |
| $\Delta$ <i>end3 pYES</i>                          | MAT $\alpha$ <i>end3 his3<math>\Delta</math>1 leu2<math>\Delta</math>0 lys2<math>\Delta</math>0 ura3<math>\Delta</math>0 [pYES empty vector]</i>                                               | This study      |
| $\Delta$ <i>end3 kAE1<sup>HA</sup></i>             | MAT $\alpha$ <i>end3 his3<math>\Delta</math>1 leu2<math>\Delta</math>0 lys2<math>\Delta</math>0 ura3<math>\Delta</math>0 [pYES kAE1<sup>HA</sup>]</i>                                          | This study      |
| $\Delta$ <i>end3 kAE1<sup>WT</sup></i>             | MAT $\alpha$ <i>end3 his3<math>\Delta</math>1 leu2<math>\Delta</math>0 lys2<math>\Delta</math>0 ura3<math>\Delta</math>0 [pYES kAE1<sup>WT</sup>]</i>                                          | This study      |
| $\Delta$ <i>end3 kAE1<sup>B3Mem</sup></i>          | MAT $\alpha$ <i>end3 his3<math>\Delta</math>1 leu2<math>\Delta</math>0 lys2<math>\Delta</math>0 ura3<math>\Delta</math>0 [pYES kAE1<sup>B3Mem</sup>]</i>                                       | This study      |
| $\Delta$ <i>pep4 pYES</i>                          | MAT $\alpha$ <i>pep4 his3<math>\Delta</math>1 leu2<math>\Delta</math>0 lys2<math>\Delta</math>0 ura3<math>\Delta</math>0 [pYES empty vector]</i>                                               | This study      |
| $\Delta$ <i>pep4 kAE1<sup>HA</sup></i>             | MAT $\alpha$ <i>pep4 his3<math>\Delta</math>1 leu2<math>\Delta</math>0 lys2<math>\Delta</math>0 ura3<math>\Delta</math>0 [pYES kAE1<sup>HA</sup>]</i>                                          | This study      |
| $\Delta$ <i>pep4 kAE1<sup>WT</sup></i>             | MAT $\alpha$ <i>pep4 his3<math>\Delta</math>1 leu2<math>\Delta</math>0 lys2<math>\Delta</math>0 ura3<math>\Delta</math>0 [pYES kAE1<sup>WT</sup>]</i>                                          | This study      |
| $\Delta$ <i>pep4 kAE1<sup>B3Mem</sup></i>          | MAT $\alpha$ <i>pep4 his3<math>\Delta</math>1 leu2<math>\Delta</math>0 lys2<math>\Delta</math>0 ura3<math>\Delta</math>0 [pYES kAE1<sup>B3Mem</sup>]</i>                                       | This study      |
| BY4742-GEV                                         | MAT $\alpha$ <i>his3<math>\Delta</math>1 leu2<math>\Delta</math>0 lys2<math>\Delta</math>0 ura3<math>\Delta</math>0, leu2<math>\Delta</math>0::PACT1-GEV-NatMX</i>                             | This study      |
| BY4742-GEV pYES- <i>kAE1<sup>WT</sup></i>          | MAT $\alpha$ <i>his3<math>\Delta</math>1 leu2<math>\Delta</math>0 lys2<math>\Delta</math>0 ura3<math>\Delta</math>0, leu2<math>\Delta</math>0::PACT1-GEV-NatMX [pYES2.1 kAE1<sup>WT</sup>]</i> | This study      |
