# Supplementary material for: Saccharomyces cerevisiae: First Steps to a Suitable Model System To Study the Function and Intracellular Transport of Human Kidney Anion Exchanger 1
Source: PubMed Central journal article supplement (PMC6992373; doi:10.1128/msphere.00802-19), 2020-01-29
Supplement: mSphere.00802-19-st002.pdf [file mSphere.00802-19-st002.pdf]

**Table S2.**

| <b>Primer</b> | <b>Construct</b>                                                           | <b>5'-3' Sequence</b>                                                        |
|---------------|----------------------------------------------------------------------------|------------------------------------------------------------------------------|
| 5' kAE1       | Amplification of untagged wild-type kAE1 with yeast-optimized codon usage  | ctcgaggaattcATGGACGAAAAGAATCAAGAATTGAGATG                                    |
| 3' kAE1       | Amplification of untagged wild-type kAE1 with yeast-optimized codon usage  | gtcgacggatccTTAAACTGGCATAGCAACTTCATCGTATTC                                   |
| 5' yeGFP      | Overhang primer for <i>in vivo</i> recombination in yeast with pYES vector | CACTATAGGGAATATTAAGCTCGCctcgagATGTCT<br>AAAGGTGAAGAATTATTCAC                 |
| 3' yeGFP      | Overhang primer for <i>in vivo</i> recombination in yeast with ykAE1       | CATCTCAATTCTTGATTCTTTTCGTC <u>Cactaccaccaccacc</u><br>TTTGTACAATTCATCCATACCA |
