# Supplementary material for: Saccharomyces cerevisiae: First Steps to a Suitable Model System To Study the Function and Intracellular Transport of Human Kidney Anion Exchanger 1
Source: PubMed Central journal article supplement (PMC6992373; doi:10.1128/msphere.00802-19), 2020-01-29
Supplement: mSphere.00802-19-st003.pdf [file mSphere.00802-19-st003.pdf]

**Table S3.**

| <b>Antibody</b>            | <b>Dilution</b> | <b>Source</b>                                                 |
|----------------------------|-----------------|---------------------------------------------------------------|
| anti-PGK1, mouse           | 1 : 1,000       | Life Technologies (Novex)                                     |
| anti-Mouse-HRP             | 1 : 10,000      | Sigma                                                         |
| anti-Rabbit-HRP            | 1 : 10,000      | Sigma                                                         |
| anti-GFP, mouse            | 1 : 1,000       | Roche                                                         |
| anti-V5, mouse             | 1 : 1,000       | AbD SeroTec                                                   |
| anti-kAE1, rabbit          | 1 : 1,000       | (1), against N-terminal region of kAE1 (aa 65 to 80)          |
| anti-kAE1, mouse (BRIC170) | 1 : 1,000       | IBGRL (9450PA), epitope in aa region 368 to 382 is recognized |
| anti-HA, rat               | 1 : 40          | Roche                                                         |
| anti-rat-FITC              | 1 : 160         | Sigma                                                         |

**References**

1. Wu F, Saleem MA, Kampik NB, Satchwell TJ, Williamson RC, Blattner SM, Ni L, Toth T, White G, Young MT, Parker MD, Alper SL, Wagner CA, Toye AM. 2010. Anion exchanger 1 interacts with nephrin in podocytes. *J Am Soc Nephrol* 21:1456-67.
